# Supplementary material
Source: Springer Nature journal article supplement (https://www.springermedizin.de/resource/supplementary/12887_2011_719_MOESM3_ESM.pdf/9475454)

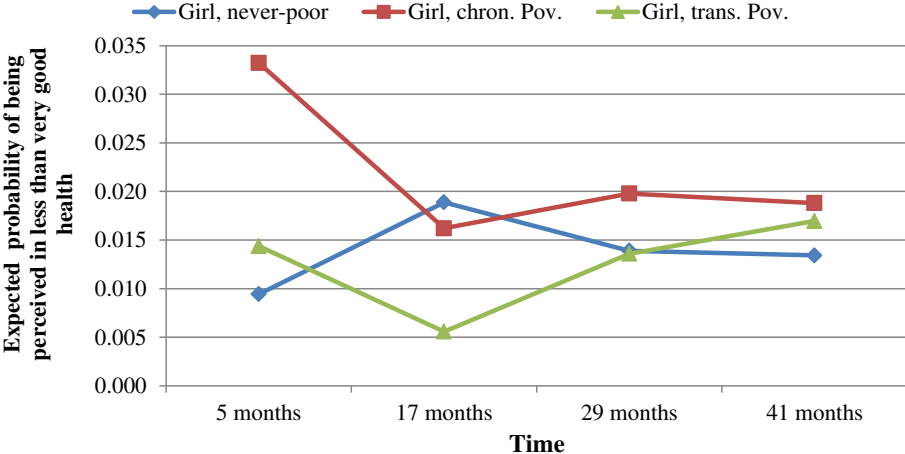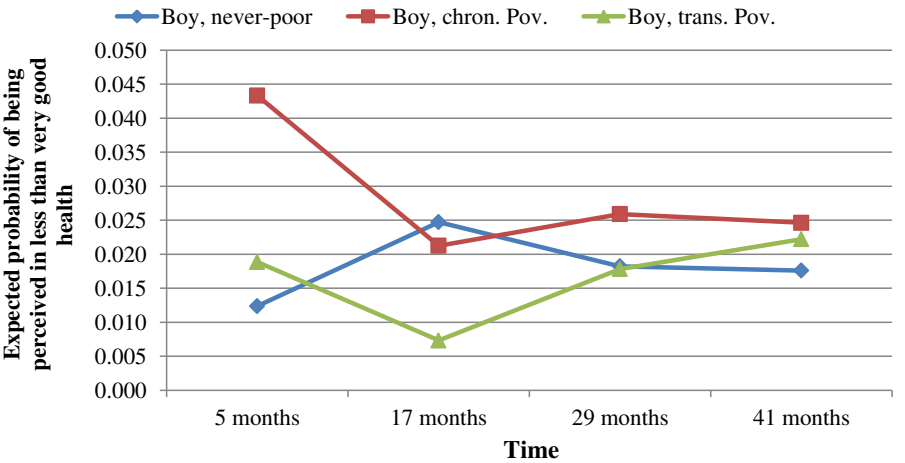

Supplement: MOESM3 [file 9475454]
